# Supplementary material for: The role of supramolecular interactions and pyridine groups in the (photo)electrocatalytic properties of a non-precious Co-based MOF
Source: Royal Society of Chemistry journal article supplement (doi:10.1039/d2se00374k), 2022-01-01
Supplement: d2se00374k1.pdf [file d2se00374k1.pdf]

## SUPPLEMENTARY INFORMATION

### The role of supramolecular interactions and pyridine groups in the (photo)electrocatalytic properties of a non-precious Co-based MOF

Luis A. Alfonso-Herrera<sup>a</sup>, Jose M. Rivera-Villanueva<sup>b</sup>, Mario Sánchez-Vázquez<sup>c</sup>, Daniel G. Araiza<sup>d</sup>, Leticia M. Torres-Martínez<sup>a,e</sup> and J. Manuel Mora-Hernandez<sup>f,\*</sup>

<sup>a</sup>Universidad Autónoma de Nuevo León, UANL, Facultad de Ingeniería Civil, Departamento de Ecomateriales y Energía, Av. Universidad S/N Ciudad Universitaria, San Nicolás de los Garza, Nuevo León, C.P. 66455, México.

<sup>b</sup>Facultad de Ciencias Químicas, Universidad Veracruzana, UV, Prolongación Oriente 6, No. 1009, Colonia Rafael Alvarado, C.P. 94340 Orizaba, Veracruz, México

<sup>c</sup>Centro de Investigación en Materiales Avanzados, S.C, C.P. 66600, Apodaca, Nuevo León, México.

<sup>d</sup>Instituto de Investigaciones en Materiales, Universidad Nacional Autónoma de México, Ciudad de México, C.P. 04510, México.

<sup>e</sup>Centro de Investigación en Materiales Avanzados, S.C. (CIMA), Miguel de Cervantes No. 120. Complejo Ind. Chihuahua, Chihuahua, Chih, C.P. 31136, México.

<sup>f</sup>CONACYT - Universidad Autónoma de Nuevo León, UANL, Facultad de Ingeniería Civil, Departamento de Ecomateriales y Energía, Av. Universidad S/N Ciudad Universitaria, San Nicolás de los Garza, Nuevo León, C.P. 66455, México.

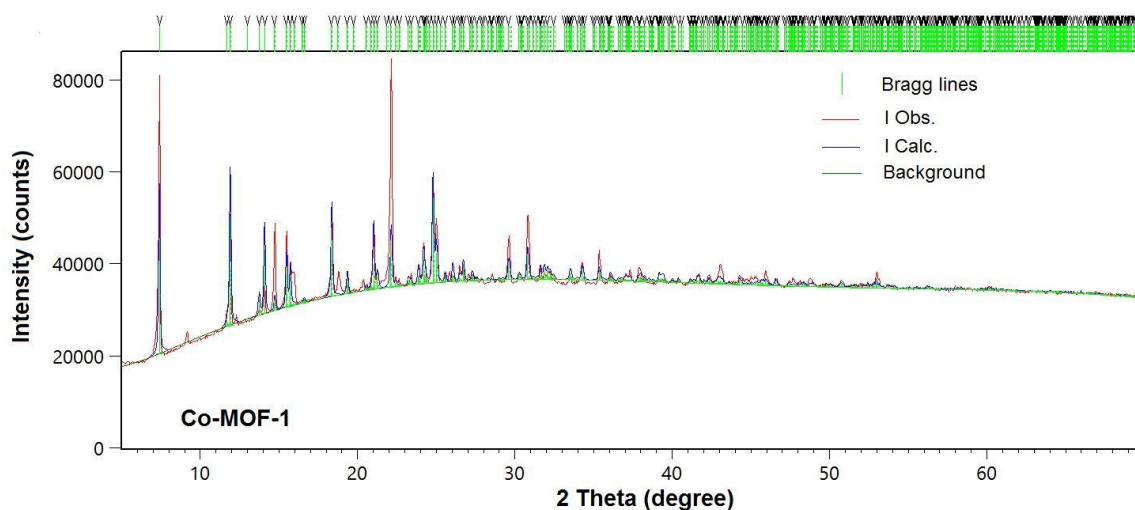

**Figure S1.** Rietveld refinement of the XRD pattern from sample Co-MOF-1 employing the HighScore Plus software

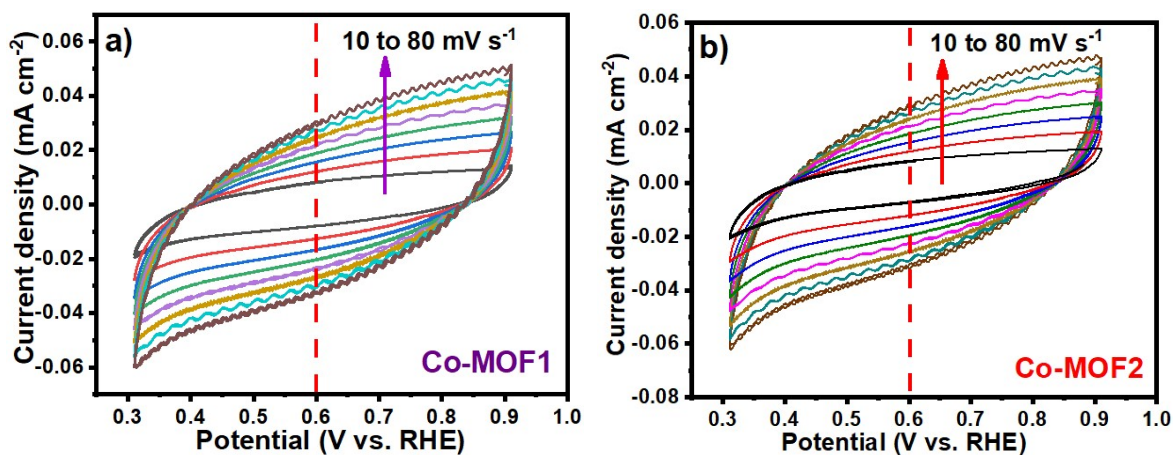

**Figure S2.** Cyclic voltammety tests in the capacitive region for Co-MOF1 and Co-MOF2 at different scan rates.

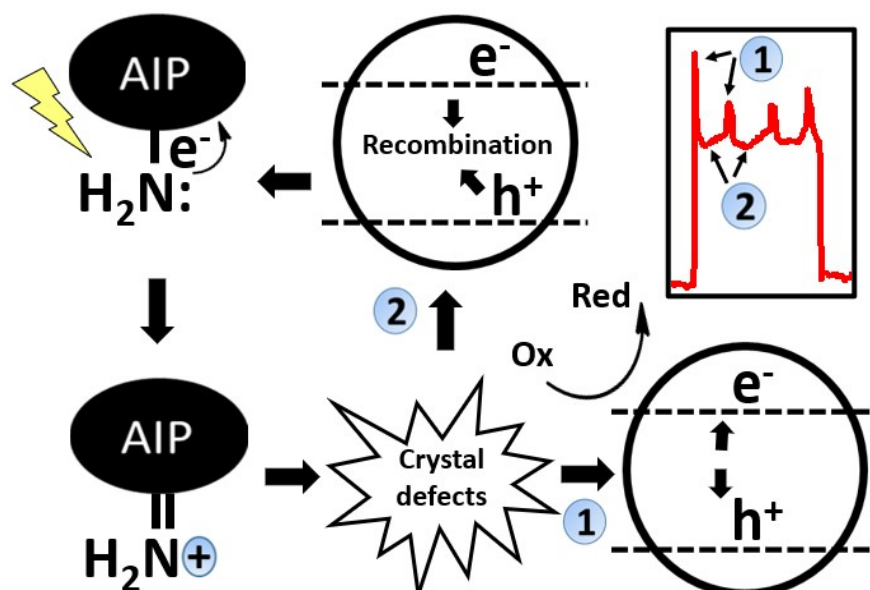

**Figure S3.** Charge carriers transport and recombination mechanism for Co-MOF2

## Co-MOF2 crystal information

### Crystatolographic data

| Compound                                | Co-MOF2                                                          |
|-----------------------------------------|------------------------------------------------------------------|
| Chemical formula                        | C <sub>18</sub> H <sub>12</sub> Co N <sub>3</sub> O <sub>4</sub> |
| Formula weight                          | 393.24                                                           |
| Space group                             | Triclinic                                                        |
| Crystal system                          | P -1                                                             |
| Crystal color and shape                 | Red needles                                                      |
| a(Å)                                    | 10.0194(2)                                                       |
| b(Å)                                    | 10.0233(10)                                                      |
| c(Å)                                    | 10.1363(10)                                                      |
| α(°)                                    | 78.030                                                           |
| β(°)                                    | 68.659                                                           |
| γ(°)                                    | 78.785                                                           |
| Volume (Å <sup>3</sup> )                | 919.60                                                           |
| Formula units per cell, Z               | 2                                                                |
| δ <sub>calc</sub> (g cm <sup>-3</sup> ) | 1.420                                                            |
| μ (mm <sup>-1</sup> )                   | 0.960                                                            |
| R-Factor (%)                            | 5.98                                                             |
| F(000)                                  | 400                                                              |
| Temperature of measurement (K)          | 297                                                              |

### Atoms labels

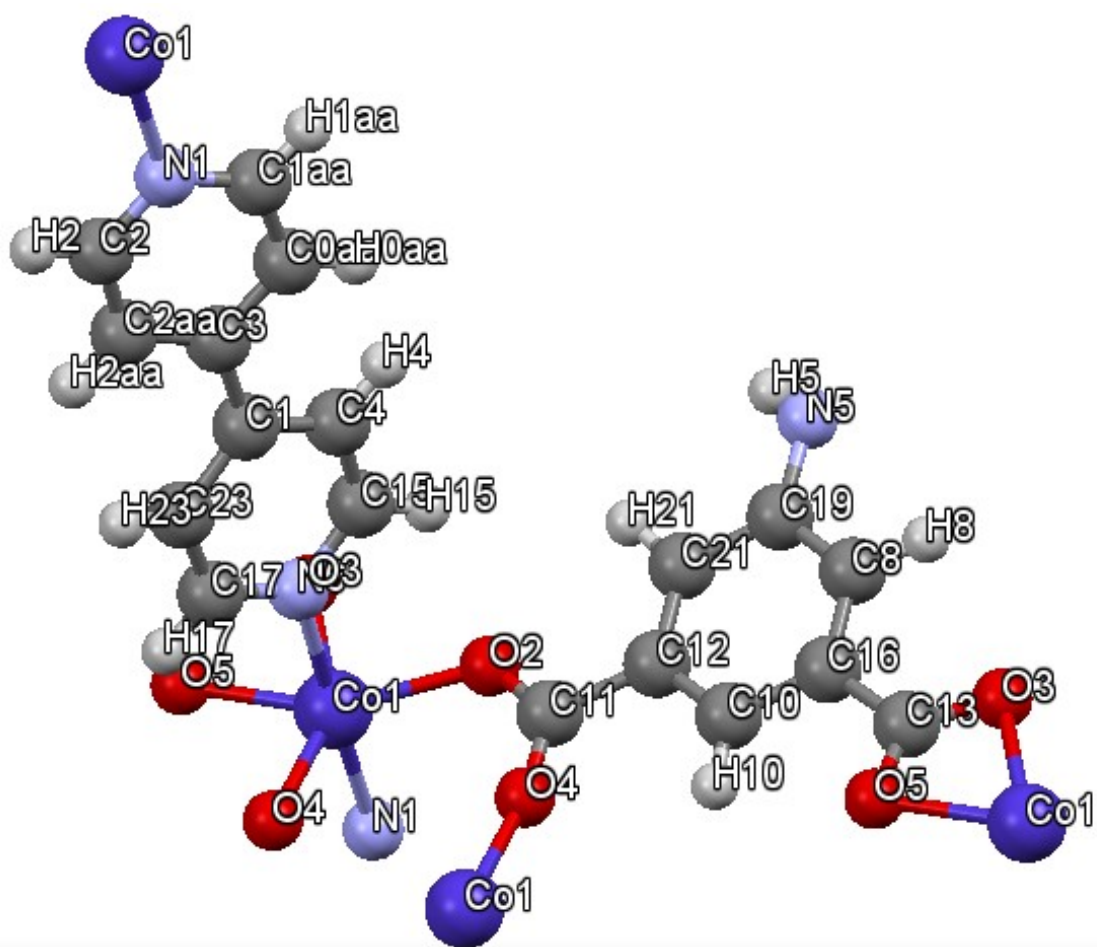

Bond distances list

| Atom1 | Atom2 | Type         | Polymeric | Cyclicity | Length (Å) |
|-------|-------|--------------|-----------|-----------|------------|
| Co1   | O2    | Coordination | no        | acyclic   | 2.035(2)   |
| Co1   | N6    | Coordination | no        | acyclic   | 2.145(2)   |
| Co1   | O3    | Coordination | yes       | acyclic   | 2.243(4)   |
| Co1   | O4    | Coordination | yes       | acyclic   | 2.020(4)   |
| Co1   | O5    | Coordination | yes       | acyclic   | 2.113(2)   |
| Co1   | N1    | Coordination | yes       | acyclic   | 2.150(2)   |
| O2    | C11   | covalent     | no        | acyclic   | 1.261(5)   |
| O3    | C13   | covalent     | no        | cyclic    | 1.241(4)   |
| O3    | Co1   | Coordination | yes       | cyclic    | 2.243(4)   |
| O4    | C11   | covalent     | no        | acyclic   | 1.237(6)   |
| O4    | Co1   | Coordination | yes       | acyclic   | 2.020(4)   |
| O5    | C13   | covalent     | no        | cyclic    | 1.257(6)   |
| O5    | Co1   | Coordination | yes       | cyclic    | 2.113(2)   |
| N6    | C15   | covalent     | no        | cyclic    | 1.338(5)   |
| N6    | C17   | covalent     | no        | cyclic    | 1.329(5)   |
| C8    | C16   | covalent     | no        | cyclic    | 1.387(7)   |
| C8    | C19   | covalent     | no        | cyclic    | 1.384(7)   |
| C8    | H8    | covalent     | no        | acyclic   | 1.02(4)    |
| C10   | C12   | covalent     | no        | cyclic    | 1.383(6)   |
| C10   | C16   | covalent     | no        | cyclic    | 1.395(4)   |
| C10   | H10   | covalent     | no        | acyclic   | 0.99(5)    |
| C11   | C12   | covalent     | no        | acyclic   | 1.501(4)   |
| C12   | C21   | covalent     | no        | cyclic    | 1.379(7)   |
| C13   | C16   | covalent     | no        | acyclic   | 1.487(6)   |
| C15   | C4    | covalent     | no        | cyclic    | 1.372(5)   |
| C15   | H15   | covalent     | no        | acyclic   | 0.96(4)    |
| C17   | C23   | covalent     | no        | cyclic    | 1.379(5)   |
| C17   | H17   | covalent     | no        | acyclic   | 0.94(5)    |
| C19   | C21   | covalent     | no        | cyclic    | 1.401(5)   |
| C19   | N5    | covalent     | no        | acyclic   | 1.381(9)   |
| C21   | H21   | covalent     | no        | acyclic   | 1.01(6)    |
| C23   | C1    | covalent     | no        | cyclic    | 1.375(5)   |
| C23   | H23   | covalent     | no        | acyclic   | 0.89(5)    |
| C1    | C3    | covalent     | no        | acyclic   | 1.484(5)   |
| C1    | C4    | covalent     | no        | cyclic    | 1.378(5)   |
| C3    | C0aa  | covalent     | no        | cyclic    | 1.343(6)   |
| C3    | C2aa  | covalent     | no        | cyclic    | 1.329(7)   |
| C4    | H4    | covalent     | no        | acyclic   | 0.930(5)   |
| N5    | H5    | covalent     | no        | acyclic   | 0.60(5)    |
| N1    | C1aa  | covalent     | no        | cyclic    | 1.296(6)   |
| N1    | C2    | covalent     | no        | cyclic    | 1.274(7)   |

|      |      |          |     |         |          |
|------|------|----------|-----|---------|----------|
| N1   | Co1  | covalent | yes | acyclic | 2.150(2) |
| C0aa | C1aa | covalent | no  | cyclic  | 1.379(6) |
| C0aa | H0aa | covalent | no  | acyclic | 0.929(7) |
| C1aa | H1aa | covalent | no  | acyclic | 0.930(7) |
| C2aa | C2   | covalent | no  | cyclic  | 1.373(7) |
| C2aa | H2aa | covalent | no  | acyclic | 0.930(9) |
| C2   | H2   | covalent | no  | acyclic | 0.930(8) |

### Angle bond list

| Atom1 | Atom2 | Atom3 | Angle    |
|-------|-------|-------|----------|
| O2    | Co1   | N6    | 87.5(1)  |
| O2    | Co1   | O3    | 90.3(1)  |
| O2    | Co1   | O4    | 119.6(1) |
| O2    | Co1   | O5    | 149.7(1) |
| O2    | Co1   | N1    | 90.9(1)  |
| N6    | Co1   | O3    | 88.7(1)  |
| N6    | Co1   | O4    | 88.8(1)  |
| N6    | Co1   | O5    | 89.7(1)  |
| N6    | Co1   | N1    | 178.1(1) |
| O3    | Co1   | O4    | 149.9(1) |
| O3    | Co1   | O5    | 59.5(1)  |
| O3    | Co1   | N1    | 92.3(1)  |
| O4    | Co1   | O5    | 90.5(1)  |
| O4    | Co1   | N1    | 91.1(1)  |
| O5    | Co1   | N1    | 92.2(1)  |
| Co1   | O2    | C11   | 120.1(2) |
| C13   | O3    | Co1   | 87.5(2)  |
| C11   | O4    | Co1   | 165.4(3) |
| C13   | O5    | Co1   | 93.0(2)  |
| Co1   | N6    | C15   | 122.0(3) |
| Co1   | N6    | C17   | 121.7(3) |
| C15   | N6    | C17   | 116.2(4) |
| C16   | C8    | C19   | 121.4(4) |
| C16   | C8    | H8    | 118(2)   |
| C19   | C8    | H8    | 120(2)   |
| C12   | C10   | C16   | 119.1(3) |
| C12   | C10   | H10   | 124(2)   |
| C16   | C10   | H10   | 117(2)   |
| O2    | C11   | O4    | 123.4(4) |
| O2    | C11   | C12   | 117.4(3) |
| O4    | C11   | C12   | 119.2(3) |

|      |      |      |          |
|------|------|------|----------|
| C10  | C12  | C11  | 119.7(3) |
| C10  | C12  | C21  | 120.5(4) |
| C11  | C12  | C21  | 119.8(3) |
| O3   | C13  | O5   | 120.0(3) |
| O3   | C13  | C16  | 121.4(3) |
| O5   | C13  | C16  | 118.6(3) |
| N6   | C15  | C4   | 123.9(4) |
| N6   | C15  | H15  | 113(3)   |
| C4   | C15  | H15  | 123(3)   |
| C8   | C16  | C10  | 120.0(4) |
| C8   | C16  | C13  | 120.0(3) |
| C10  | C16  | C13  | 120.0(3) |
| N6   | C17  | C23  | 123.4(4) |
| N6   | C17  | H17  | 115(3)   |
| C23  | C17  | H17  | 121(3)   |
| C8   | C19  | C21  | 117.8(4) |
| C8   | C19  | N5   | 119.6(4) |
| C21  | C19  | N5   | 122.6(4) |
| C12  | C21  | C19  | 121.2(4) |
| C12  | C21  | H21  | 123(3)   |
| C19  | C21  | H21  | 116(3)   |
| C17  | C23  | C1   | 120.0(4) |
| C17  | C23  | H23  | 118(3)   |
| C1   | C23  | H23  | 122(3)   |
| C23  | C1   | C3   | 122.1(4) |
| C23  | C1   | C4   | 117.1(4) |
| C3   | C1   | C4   | 120.8(4) |
| C1   | C3   | C0aa | 123.0(4) |
| C1   | C3   | C2aa | 122.8(4) |
| C0aa | C3   | C2aa | 114.3(5) |
| C15  | C4   | C1   | 119.4(4) |
| C15  | C4   | H4   | 120.3(5) |
| C1   | C4   | H4   | 120.3(5) |
| C19  | N5   | H5   | 117(5)   |
| C1aa | N1   | C2   | 114.6(4) |
| C1aa | N1   | Co1  | 122.9(3) |
| C2   | N1   | Co1  | 122.4(4) |
| C3   | C0aa | C1aa | 121.0(5) |
| C3   | C0aa | H0aa | 119.5(6) |
| C1aa | C0aa | H0aa | 119.5(7) |
| N1   | C1aa | C0aa | 123.9(5) |
| N1   | C1aa | H1aa | 118.1(6) |
| C0aa | C1aa | H1aa | 118.0(6) |

|      |      |      |          |
|------|------|------|----------|
| C3   | C2aa | C2   | 121.3(6) |
| C3   | C2aa | H2aa | 119.3(8) |
| C2   | C2aa | H2aa | 119.4(8) |
| N1   | C2   | C2aa | 125.0(6) |
| N1   | C2   | H2   | 117.5(8) |
| C2aa | C2   | H2   | 117.5(8) |
| O3   | Co1  | O5   | 59.5(1)  |
